# Supplementary material for: Yolk–shell structured Y2O3:Eu3+ phosphor powders with enhanced photoluminescence properties prepared by spray pyrolysis
Source: Royal Society of Chemistry journal article supplement (doi:10.1039/c4ce00535j), 2014-01-01
Supplement: c4ce00535j1.pdf [file c4ce00535j1.pdf]

## Supporting Information

### Yolk–Shell Structured $\text{Y}_2\text{O}_3:\text{Eu}^{3+}$ Phosphor Powders with Enhanced Photoluminescence Properties Prepared by Spray Pyrolysis

Jung Sang Cho, Kwang Min Yang, and Yun Chan Kang\*

Department of Chemical Engineering, Konkuk University, 1 Hwayang-dong, Gwangjin-gu,  
Seoul 143-701, Republic of Korea

#### **This file includes:**

- Schematic diagram of the large scale ultrasonic spray pyrolysis process and formation mechanism of the yolk-shell-structured  $\text{Y}_2\text{O}_3:\text{Eu}^{3+}$  phosphor powder.
- Thermogravimetric analysis of the  $\text{Y}_2\text{O}_3:\text{Eu}^{3+}$  phosphor powders directly prepared by spray pyrolysis.
- SEM image of the  $\text{Y}_2\text{O}_3:\text{Eu}^{3+}$  phosphor powders prepared from the spray solution without sucrose after post-treatment at 1200°C.
- XRD patterns of the post-treated  $\text{Y}_2\text{O}_3:\text{Eu}^{3+}$  phosphor powders prepared from the spray solution (a) without sucrose at 1200°C and with sucrose at (b) 1000°C, (c) 1100°C, (d) 1200°C, (e) 1300°C.
- $\text{N}_2$  adsorption-desorption isotherms measured at 77 K for the  $\text{Y}_2\text{O}_3:\text{Eu}^{3+}$  yolk-shell phosphor powders post-treated at various temperatures.
- SEM images of the powders prepared by spray drying process (a) before and (b) after post-treatment at 1200°C.
- Emission spectra of the yolk-shell and nano-structured  $\text{Y}_2\text{O}_3:\text{Eu}^{3+}$  phosphor powders.
- SEM images of the  $\text{Y}_2\text{O}_3:\text{Eu}^{3+}$  phosphor powders prepared from the spray solution with sucrose in  $\text{N}_2$  atmosphere: (a) before heat-treatment and (b) after heat-treatment at 800°C under air atmosphere.

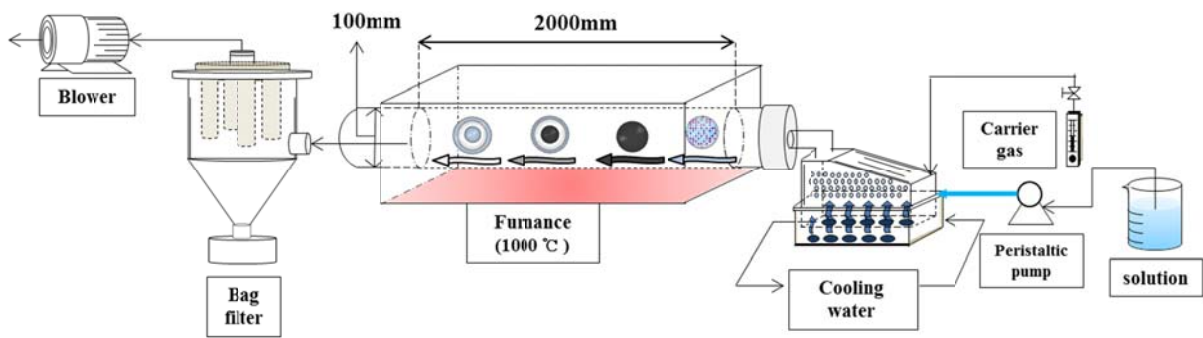

(a)

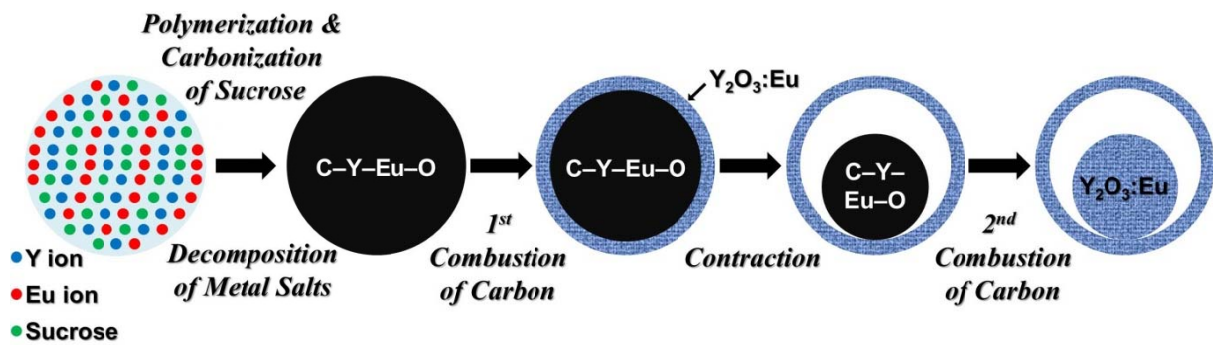

(b)

**Fig. S1** Schematic diagram of the large scale ultrasonic spray pyrolysis process and formation mechanism of the yolk-shell-structured  $\text{Y}_2\text{O}_3:\text{Eu}^{3+}$  phosphor powder.

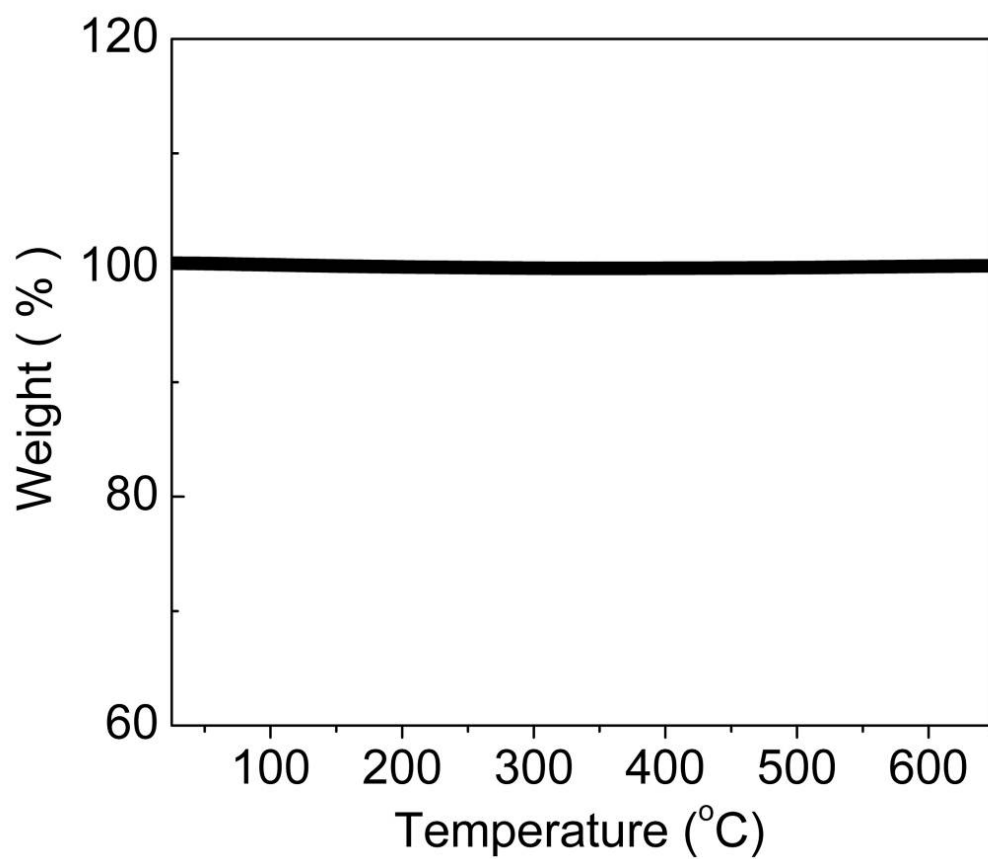

**Fig. S2** Thermogravimetric analysis of the Y<sub>2</sub>O<sub>3</sub>:Eu<sup>3+</sup> phosphor powders directly prepared by spray pyrolysis.

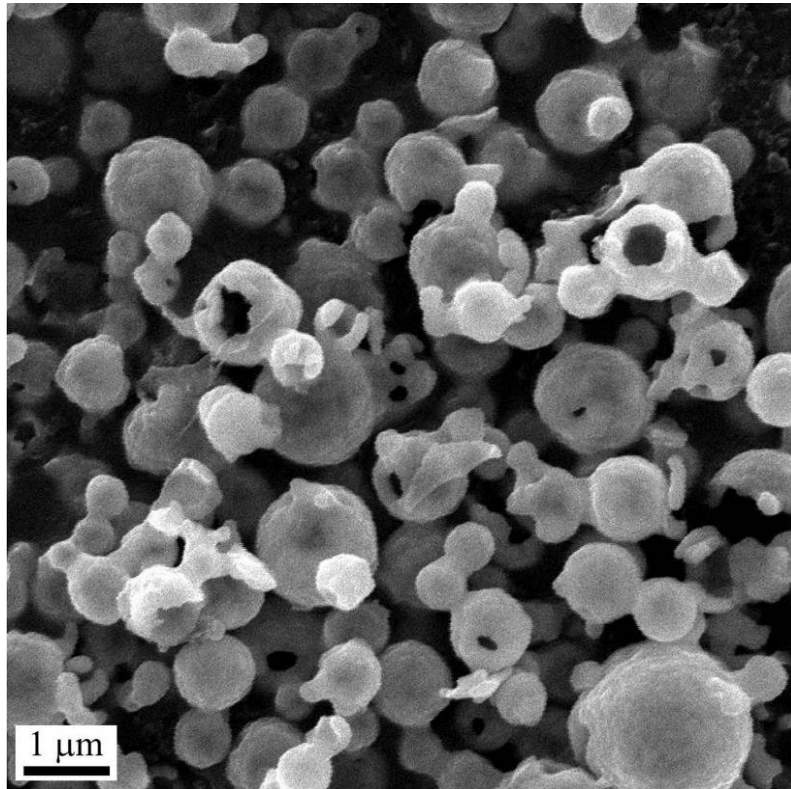

**Fig. S3** SEM image of the  $\text{Y}_2\text{O}_3:\text{Eu}^{3+}$  phosphor powders prepared from the spray solution without sucrose after post-treatment at  $1200^\circ\text{C}$ .

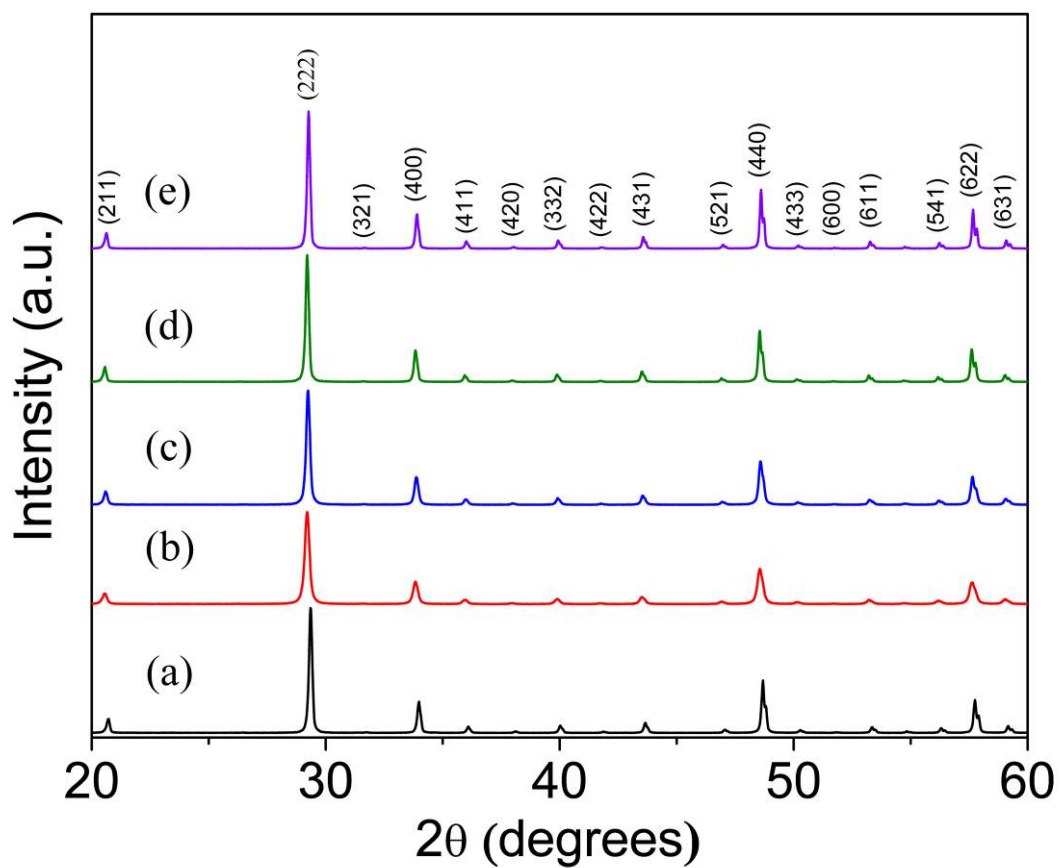

**Fig. S4** XRD patterns of the post-treated  $\text{Y}_2\text{O}_3:\text{Eu}^{3+}$  phosphor powders prepared from the spray solution (a) without sucrose at  $1200^\circ\text{C}$  and with sucrose at (b)  $1000^\circ\text{C}$ , (c)  $1100^\circ\text{C}$ , (d)  $1200^\circ\text{C}$ , (e)  $1300^\circ\text{C}$ .

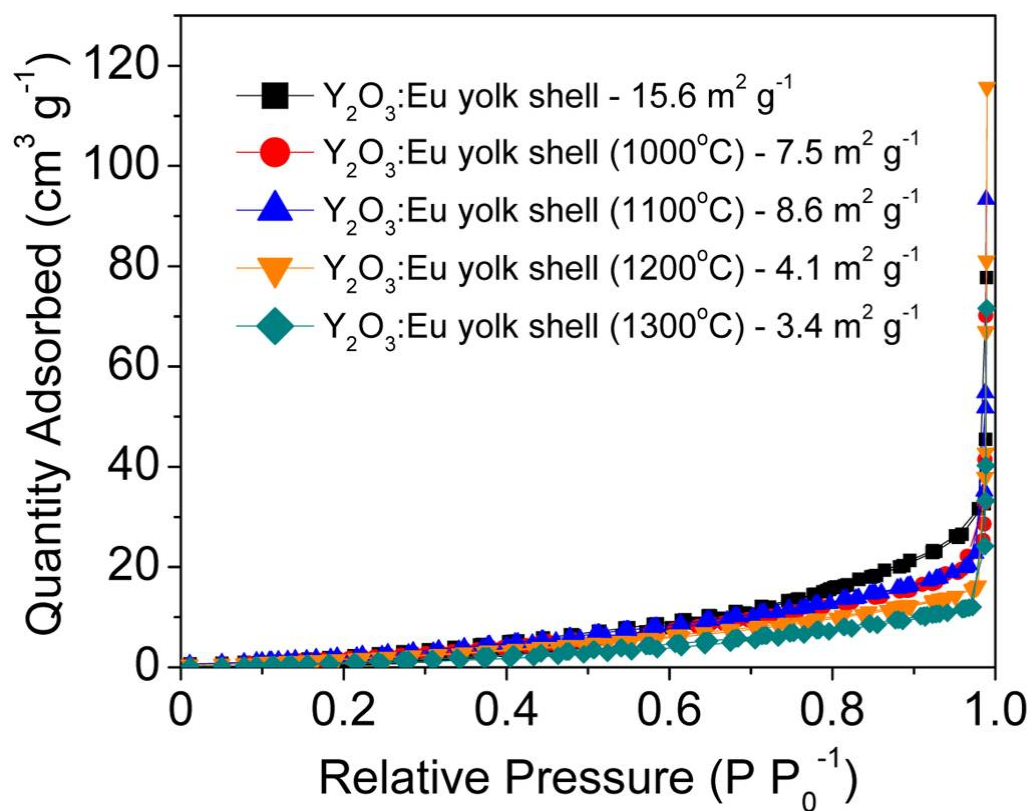

**Fig. S5** N<sub>2</sub> adsorption-desorption isotherms measured at 77 K for the Y<sub>2</sub>O<sub>3</sub>:Eu<sup>3+</sup> yolk-shell phosphor powders post-treated at various temperatures.

Nano-structured  $\text{Y}_2\text{O}_3:\text{Eu}$  phosphor powders were prepared by spray drying process applying citric acid (CA) as the chelating agent. The total concentration of Y and Eu components was fixed at 0.2 M, and the concentration of CA was fixed at 0.5 M. For the preparation of nano-structured powders, the intermediate hollow-structured precursor powders obtained by spray drying process were milled for 3 h by planetary mill. And then, it was post-treated at  $1200^\circ\text{C}$ . Subsequently, its photoluminescence property was compared with those of the hollow-structured and yolk-shell structured powders. As a result, the photoluminescence intensity of the  $\text{Y}_2\text{O}_3:\text{Eu}^{3+}$  yolk-shell phosphor was the highest compared to the other structures. The photoluminescence intensities of the nano-structured and hollow-structured phosphor powders were 74 %, and 59 %, respectively, of that of the yolk-shell phosphor powders prepared at the same post-treatment temperature of  $1200^\circ\text{C}$ .

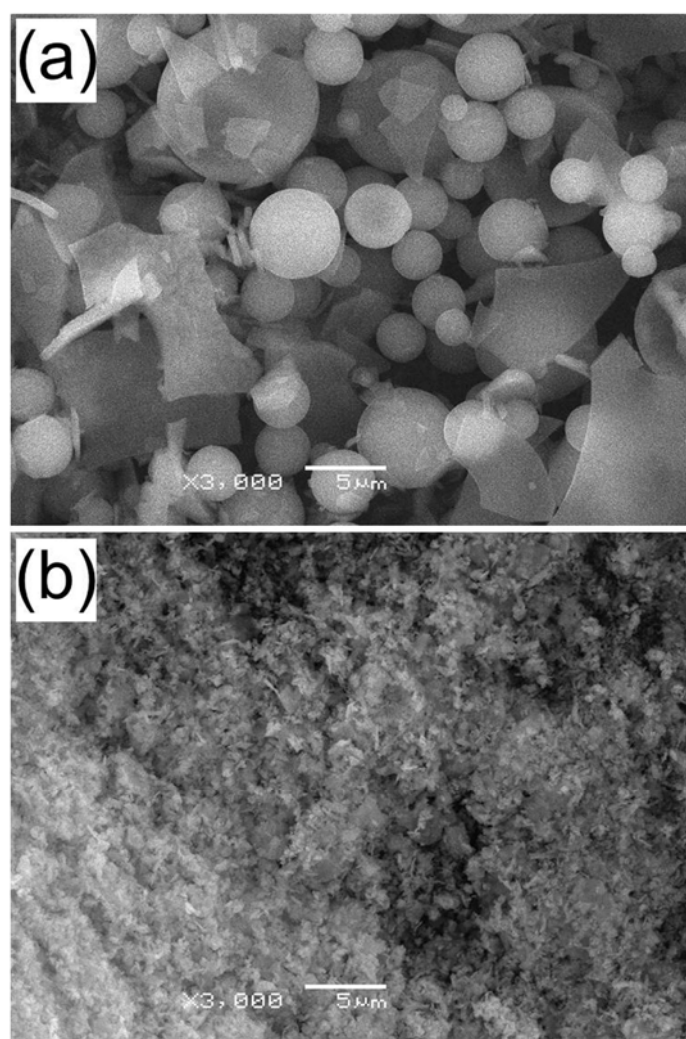

**Fig. S6** SEM images of the powders prepared by spray drying process (a) before and (b) after post-treatment at  $1200^\circ\text{C}$ .

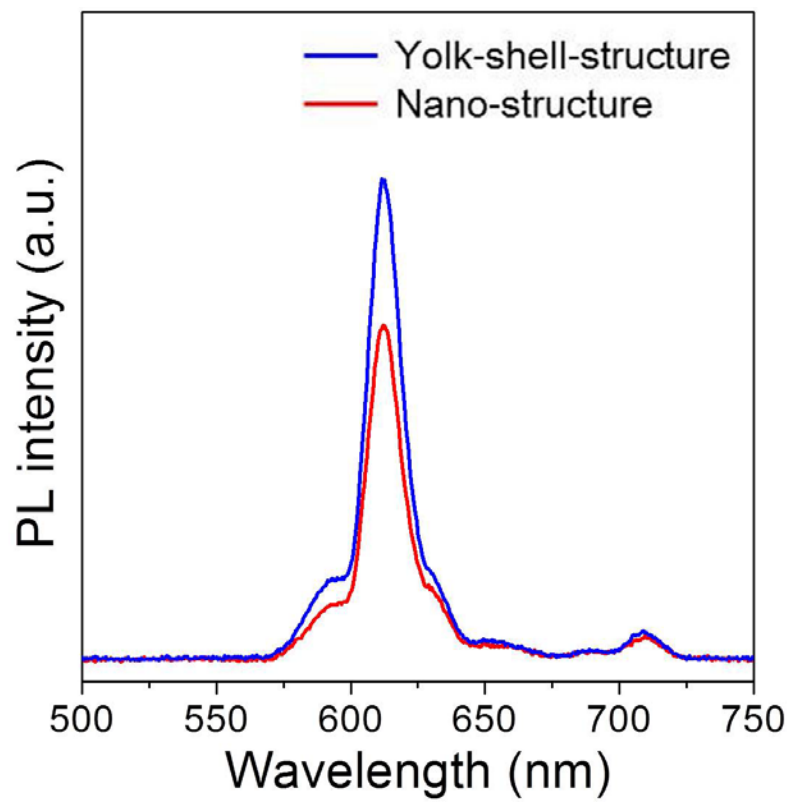

**Fig. S7** Emission spectra of the yolk-shell and nano-structured  $\text{Y}_2\text{O}_3:\text{Eu}^{3+}$  phosphor powders.



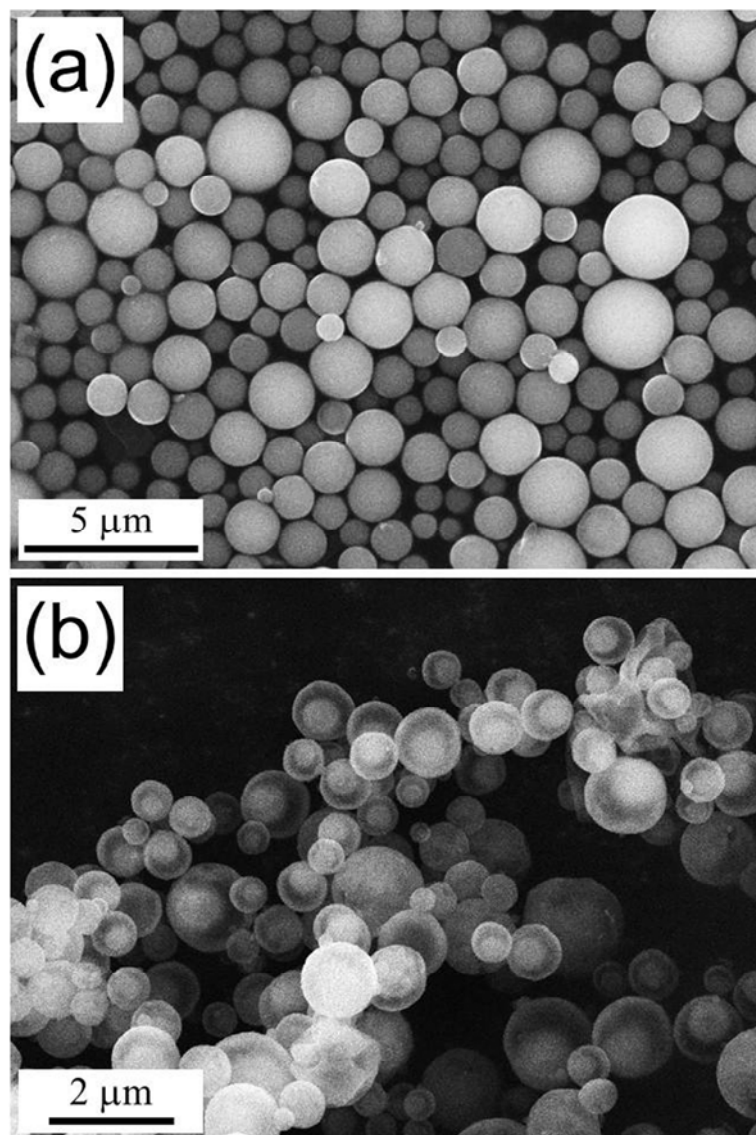

**Fig. S8** SEM images of the  $\text{Y}_2\text{O}_3:\text{Eu}^{3+}$  phosphor powders prepared from the spray solution with sucrose in  $\text{N}_2$  atmosphere: (a) before heat-treatment and (b) after heat-treatment at  $800^\circ\text{C}$  under air atmosphere.
